# Supplementary material for: Autocitrullination and Changes in the Activity of Peptidylarginine Deiminase 3 Induced by High Ca2+ Concentrations
Source: PubMed Central journal article supplement — ACS Omega. 2022 Aug 8;7(32):28378–87. doi: 10.1021/acsomega.2c02972 (PMC9386831; doi:10.1021/acsomega.2c02972), 2022-08-08
Supplement: ao2c02972_si_001.pdf [file ao2c02972_si_001.pdf]

# Autocitrullination and changes in the activity of peptidylarginine deiminase 3 induced by high Ca<sup>2+</sup> concentrations

*Mizuki Sawata<sup>1</sup>, Hiroki Shima<sup>2</sup>, Kazutaka Murayama<sup>3</sup>, Toshitaka Matsui<sup>4</sup>, Kazuhiko  
Igarashi<sup>2</sup>, Kazumasa Funabashi<sup>1</sup>, Kenji Ite<sup>1</sup>, Kenji Kizawa<sup>5</sup>, Hidenari Takahara<sup>6,7</sup>, Masaki*

*Unno<sup>1,7</sup> \**

<sup>1</sup>Graduate School of Science and Engineering, Ibaraki University, Hitachi, Japan,

<sup>2</sup>Department of Biochemistry, Tohoku University Graduate School of Medicine, Sendai,  
Japan, <sup>3</sup>Graduate School of Biomedical Engineering, Tohoku University, Sendai, Japan,

<sup>4</sup>Institute of Multidisciplinary Research for Advanced Materials, Tohoku University,  
Sendai, Japan, <sup>5</sup>Kao Corporation, Biological Science Research Laboratory, Odawara, Japan,

<sup>6</sup>College of Agriculture, Ibaraki University, Ami Inashiki, Japan, <sup>7</sup>Frontier Research Center  
for Applied Atomic Sciences, Ibaraki University, Naka, Japan.

## Supporting Information

\*Maaski Unno, 4-12-1 Nakanarusawa, Hitachi, Ibaraki 316-8511, Japan, Telephone & Fax; +81-294-38-5041, E-mail; [masaki.unno.19@vc.ibaraki.ac.jp](mailto:masaki.unno.19@vc.ibaraki.ac.jp)

Supporting Information

**Table S1.** Quantification of the citrulline concentration based on the bands observed in western blotting showing CaCl<sub>2</sub> concentration dependency

| <b>CaCl<sub>2</sub> (mM)</b>      | <b>0</b> | <b>0.5</b> | <b>1</b> | <b>2</b> | <b>4</b> |
|-----------------------------------|----------|------------|----------|----------|----------|
| <b>Band concentrations* (AMC)</b> | 10       | 10         | 11       | 53       | 60       |

## Supporting Information

**Table S2.** Quantification of the citrulline concentration based on the bands observed in western blotting showing CaCl<sub>2</sub> incubation time dependency.

| <b>Time (min)</b> | <b>0</b> | <b>5</b> | <b>10</b> | <b>20</b> | <b>30</b> | <b>60</b> | <b>120</b> | <b>180</b> | <b>240</b> |
|-------------------|----------|----------|-----------|-----------|-----------|-----------|------------|------------|------------|
| <b>AMC</b>        | 6        | 7        | 9         | 14        | 15        | 23        | 27         | 26         | 33         |
| <b>Anti-PAD3</b>  | 232      | 235      | 237       | 229       | 222       | 227       | 227        | 225        | 213        |

AMC, anti-modified citrulline; PAD3, peptidylarginine deiminase 3.

Supporting Information

**Table S3.** Protein sequence coverage detected using liquid chromatography-mass spectrometry/mass spectrometry

| <b>Sample #</b> | <b>Protein sequence coverage (%)</b> | <b>Sample #</b> | <b>Protein sequence coverage (%)</b> |
|-----------------|--------------------------------------|-----------------|--------------------------------------|
| (1)             | 60                                   | (8)             | 28                                   |
| (2)             | 50                                   | (9)             | 28                                   |
| (3)             | 54                                   | (10)            | 30                                   |
| (4)             | 59                                   | (11)            | 44                                   |
| (5)             | 29                                   | (12)            | 42                                   |
| (6)             | 29                                   | (13)            | 45                                   |
| (7)             | 27                                   | (14)            | 43                                   |
